# Supplementary material for: A Prospective, Randomized, Placebo-Controlled Study of a Combination of Simvastatin and Chemotherapy in Metastatic Breast Cancer
Source: Hindawi journal article supplement (doi:10.1155/2020/4174395), 2020-08-10
Supplement: f1 [file 4174395.f1.pdf]

**Table 1. Serum levels of TC, LDL-C and HDL-C throughout the study cycles**

| Variable             | Simvastatin                      |             | Placebo                          |             | P value     |                    |
|----------------------|----------------------------------|-------------|----------------------------------|-------------|-------------|--------------------|
|                      | 1 <sup>st</sup> day chemotherapy |             | 8 <sup>th</sup> day chemotherapy |             |             |                    |
|                      | Mean ± SD                        |             | Mean ± SD                        |             |             |                    |
| <b>TC (mg/dl)</b>    |                                  |             |                                  |             |             |                    |
| Baseline (day -7)    | 214.5± 49.1                      | 204.1± 45.6 | 0.39                             |             |             |                    |
| Cycle 1              | 164.3± 39.7                      | 211.6± 32.3 | <b>0.0003</b>                    | 153.6± 34.3 | 185± 35.1   | <b>0.004</b>       |
| Cycle 2              | 175.3± 42.6                      | 217.1± 50.3 | <b>0.0003</b>                    | 155.5± 37.2 | 197.4± 47.1 | <b>0.0002</b>      |
| Cycle 3              | 173.8± 37.9                      | 204.7± 45.7 | <b>0.003</b>                     | 162.4± 29.5 | 192.5± 36.3 | <b>0.002</b>       |
| Cycle 4              | 178.1± 34.5                      | 223.3± 47.9 | <b>0.0002</b>                    | 163.5± 28.5 | 205.6± 44.8 | <b>0.0006</b>      |
| Cycle 5              | 169.6± 37.9                      | 219.7± 44.9 | <b>0.001</b>                     | 158.9± 19.9 | 201.7± 45.4 | <b>0.003</b>       |
| Cycle 6              | 168.6± 40.1                      | 214.9± 48.3 | <b>0.008</b>                     | 154± 27.9   | 211.3± 48.9 | <b>0.002</b>       |
| <b>LDL-C (mg/dl)</b> |                                  |             |                                  |             |             |                    |
| Baseline (day -7)    | 127.3± 38.4                      | 124.5± 35.1 | 0.77                             |             |             |                    |
| Cycle 1              | 88.71± 28                        | 125.7± 24.9 | <b>0.0001</b>                    | 84.12± 31.2 | 107.2± 23.5 | <b>0.008</b>       |
| Cycle 2              | 100.5± 30.9                      | 129.7± 33.2 | <b>0.0003</b>                    | 81.3± 27.7  | 119.9± 36.3 | <b>&lt; 0.0001</b> |
| Cycle 3              | 101.8± 28.9                      | 125.4± 34.5 | <b>0.003</b>                     | 91.6± 22.4  | 116.6± 31.3 | <b>0.002</b>       |
| Cycle 4              | 104.3± 27.3                      | 136.8± 36.4 | <b>0.0004</b>                    | 93.2± 17    | 122.9± 36.1 | <b>0.001</b>       |
| Cycle 5              | 97.6± 23.4                       | 132.1± 35.3 | <b>0.002</b>                     | 93.1± 19.3  | 125± 38.8   | <b>0.009</b>       |
| Cycle 6              | 98.1± 18.4                       | 136.5± 39.6 | <b>0.002</b>                     | 89.1± 17.6  | 138.9± 38.2 | <b>0.0004</b>      |
| <b>HDL-C (mg/dl)</b> |                                  |             |                                  |             |             |                    |
| Baseline (day -7)    | 51.03± 13.3                      | 51.3± 11.5  | 0.93                             |             |             |                    |
| Cycle 1              | 49.2± 13.7                       | 51.2± 11.6  | 0.63                             | 49.97± 11.5 | 46.2± 14    | 0.31               |
| Cycle 2              | 48.3± 9.9                        | 54.2± 14.6  | <b>0.04</b>                      | 47.2± 11.3  | 49.7± 12.6  | 0.40               |
| Cycle 3              | 43.5± 9.2                        | 48.97± 14.3 | 0.06                             | 44.4± 7.6   | 48.4± 10.2  | 0.11               |
| Cycle 4              | 48.3± 10.8                       | 51.2± 9.8   | 0.3                              | 48.4± 10.6  | 51.7± 12.3  | 0.33               |
| Cycle 5              | 46.4± 10.6                       | 56.6± 15.2  | 0.02                             | 46.6± 8.9   | 53.4± 15.5  | 0.16               |
| Cycle 6              | 48.3± 17.1                       | 54.7± 16.3  | 0.29                             | 47.3± 16.6  | 53.5± 16.3  | 0.35               |

**Table 2. Serum levels of hsCRP and LDH throughout the study cycles**

| <b>Variable</b>     | <b>Chemotherapy<br/>+ simvastatin</b> | <b>Chemotherapy<br/>+ placebo</b> | <b>P value</b> |
|---------------------|---------------------------------------|-----------------------------------|----------------|
| <b>hsCRP (mg/L)</b> | <b>Median (minimum- maximum)</b>      |                                   |                |
| Baseline (day -7)   | 7.98 (0.51-125.6)                     | 8.93 (0.49-127.1)                 | 0.54           |
| Cycle 1             | 7.5 (0.579-86.19)                     | 8.51 (0.5-99.29)                  | 0.87           |
| Cycle 2             | 10.41 (1.2-65.42)                     | 8.215 (1.06-37.9)                 | 0.26           |
| Cycle 3             | 11.95 (1.02-129)                      | 8.715 (0.31-43.28)                | 0.25           |
| Cycle 4             | 10.8 (0.09-166.9)                     | 9.76 (0.76-57.4)                  | 0.23           |
| Cycle 5             | 13.47 (2.46-183.7)                    | 4.7 (1.1-34.35)                   | 0.11           |
| Cycle 6             | 13.98 (1-152.4)                       | 5.1 (1.07-18.54)                  | 0.13           |
| <b>LDH (U/L)</b>    |                                       |                                   |                |
| Baseline (day -7)   | 589.5 (219-1830)                      | 538 (26-1920)                     | 0.42           |
| Cycle 1             | 532 (276-1880)                        | 597.5 (341-1905)                  | 0.60           |
| Cycle 2             | 489 (133-1099)                        | 530 (234-1990)                    | 0.59           |
| Cycle 3             | 533.5 (151-2011)                      | 518.5 (6.74-2892)                 | 0.94           |
| Cycle 4             | 462 (179-2007)                        | 500 (325-2869)                    | 0.76           |
| Cycle 5             | 484 (282-1457)                        | 489 (376-1811)                    | 0.62           |
| Cycle 6             | 481.5 (113-1131)                      | 437 (319-1125)                    | 0.58           |
